# Supplementary material
Source: PubMed Central journal article supplement (PMC6286156)
Supplement: NIHMS1511660-supplement-1.pdf [file NIHMS1511660-supplement-1.pdf]

## Supplementary Figure 1

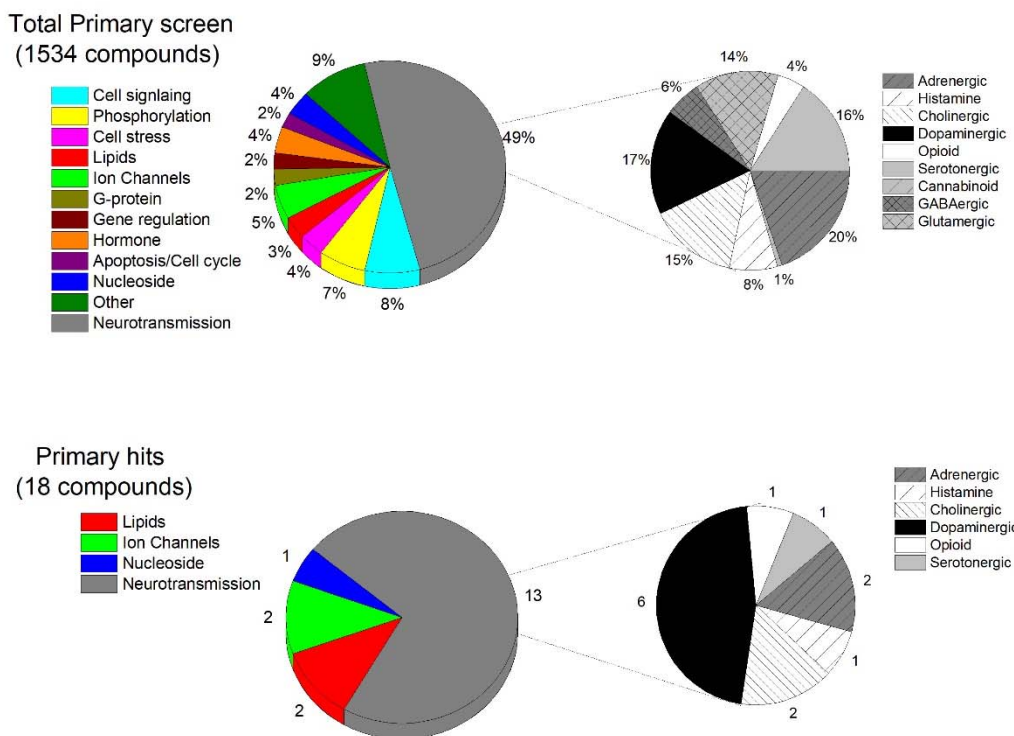

### Supplementary Figure 1. Functional classification of screened drugs and candidate hits.

*Top*, Schematic representation of functional classification of drug hits (categories reflect LOPAC<sub>1280</sub> 'pharmacological action' ontology) in the primary screen (1534 compounds). Distribution within the largest class ('neurotransmission') is expanded by neurotransmitter category. *Bottom*, functional grouping of 18 candidate hits from the primary screen (shown by number of compounds) using the same classification nomenclature.

## Supplementary Figure 2

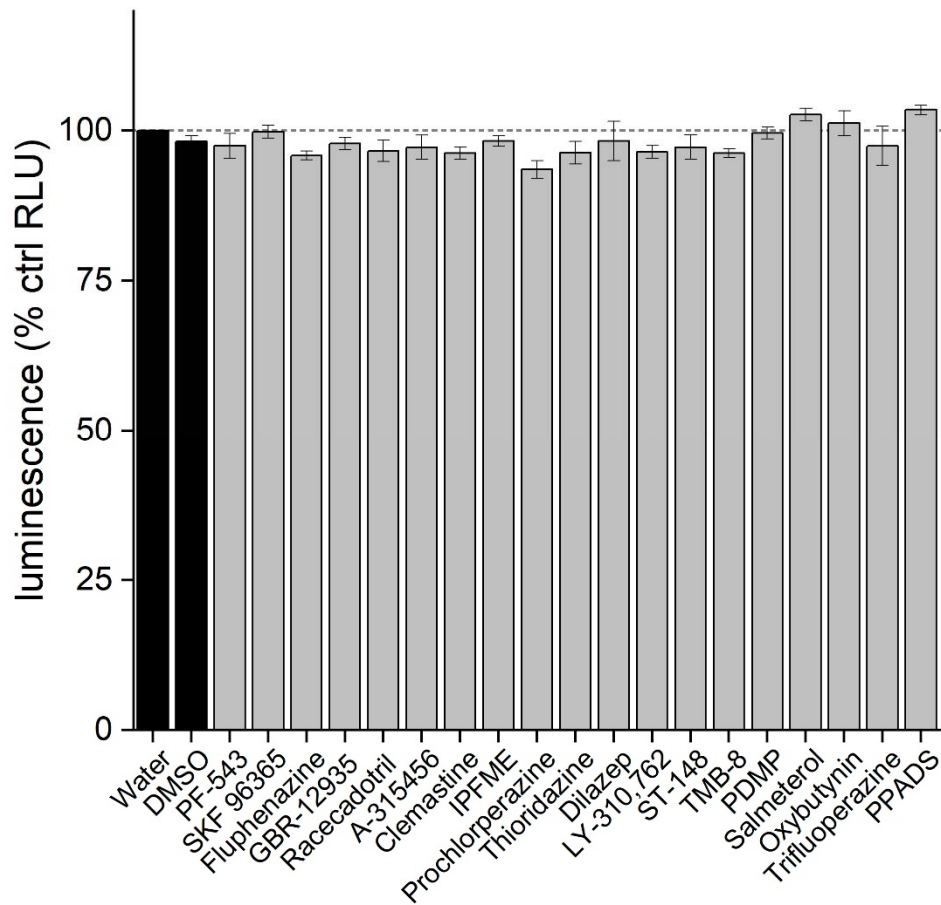

**Supplementary Figure 2. Effect of drug treatment on cell viability.** Measurements of luminescence intensity in U2OS cells treated with indicated drugs (30 $\mu$ M, grey bars) or vehicle (black bars) for 8 hours, detected using the luciferase based CellTiter Glo2.0 system.
